# Supplementary material
Source: PubMed Central journal article supplement (PMC3254042)
Supplement: dne0033-0451-s01.pdf [file dne0033-0451-s01.pdf]

### *Supplementary material*

Supplementary Figure S1: Differential protein expression of EZH2 and MECP2 in Ts65Dn hippocampus compared with euploid. Western blots with proteins extracted from hippocampal tissue (n=4 for each group) of Ts65D (T) and euploid (E) mice, hybridized with either anti-EZH2 or anti-MECP2 antibodies. For quantitative analysis of Western blots, optical intensity of bands was evaluated with MultiGuage software. The optical intensity data for each Western blot band was divided by its respective GAPDH intensity to normalize for gel loading variation. (B) Relative intensity averaged from Ts65Dn and euploid control Western blot bands after normalization with GAPDH  $\pm$  SEM for EZH2 ( $p=0.07$ ) and MECP2 ( $p=0.06$ ).

Supplementary Figure S2: Histopathological analysis of Ts65Dn and euploid mouse lungs (A) Representative example of euploid pulmonary vessel, wall measurement of 13 samples was  $\sim 42 \mu\text{m}$  in width, measured from the endothelium through the tunica intima, tunica media and the adventitia. Tissue surrounding the vessel is normal alveolar septae and within the lumen of the vessel are myriad erythrocyte, H&E 400x. (B) Representative example of Ts65Dn pulmonary vessel, wall measurement of all 10 samples was  $\sim 41.5 \mu\text{m}$  in width, measured as for euploid samples, H&E 400x. (C) Representative example of euploid pulmonary vessel, with the vessel wall composed of the endothelium overlying a small amount of fibrous connective tissue of the tunica intima, bounded by the smooth muscle of the tunica media (red) and merging with the fibrous outer layer of the adventitia (blue), Masson's Trichrome, 400x. (D) Representative example of Ts65Dn pulmonary vessel, with histological features identical to euploid samples, with no increased amounts of collagen deposition or hypertrophy of leiomyocytes noted, Masson's Trichrome, 400x.

Supplementary Table 1: List of miRNA genes with fold change and statistical significance of differential expression. Values are reported for the three groups: (a) miRNA with significant changes in expression level between trisomy and euploid groups of mice ( $p < 0.05$ ), (b) overexpressed miRNAs in trisomy mice (Fold Change  $\geq 2$ ), and (c) overexpressed miRNAs in euploid mice (Fold Change  $\geq 2$ ). Undetermined fold change values refer to those situations when the miRNA expression could not be detected in one of the biological groups.

Supplementary Table 2: *In silico* gene targets of 12 differentially expressed miRNAs selected from TaqMan array and individual assay results. Targets were selected based on an in-house developed computer program that utilizes publicly available data from the following five resources: (i) [microrna.org](http://www.microrna.org/) [http://www.microrna.org/], (ii) [mirDB](http://mirdb.org/miRDB/) [http://mirdb.org/miRDB/], (iii) [RNA22](http://cbcsrv.watson.ibm.com/) [http://cbcsrv.watson.ibm.com/] and (iv) [TargetScan](http://www.targetscan.org/) [http://www.targetscan.org/] (v) [microT](http://diana.cslab.ece.ntua.gr/microT/) (http://diana.cslab.ece.ntua.gr/microT/). We selected gene targets for miRNA only when they were common predictions from all five resources mentioned here. A conservative search strategy was employed to reduce SNR (signal to noise ratio) by selecting a miTG score cutoff of 13 based on predictions by the microT server. It should be noted that some genes are targeted by more than one miRNAs. The genes involved in synaptic plasticity and neuroglia signaling pathway represented in Fig. 7 have been highlighted.

Supplementary Table 3: miRNAs expression in Ts65Dn lung tissue. Relative expression levels in 5 trisomy samples  $\pm$  SEM is shown with respect to 5 euploid controls. No detectable expression was observed for miR-802 in lung tissue of neither trisomy nor control mice.

Supplementary Table 4: MiRNA sequences used in individual miRNA assays and primers sequence used in real-time PCR experiments to quantify mRNAs expression.

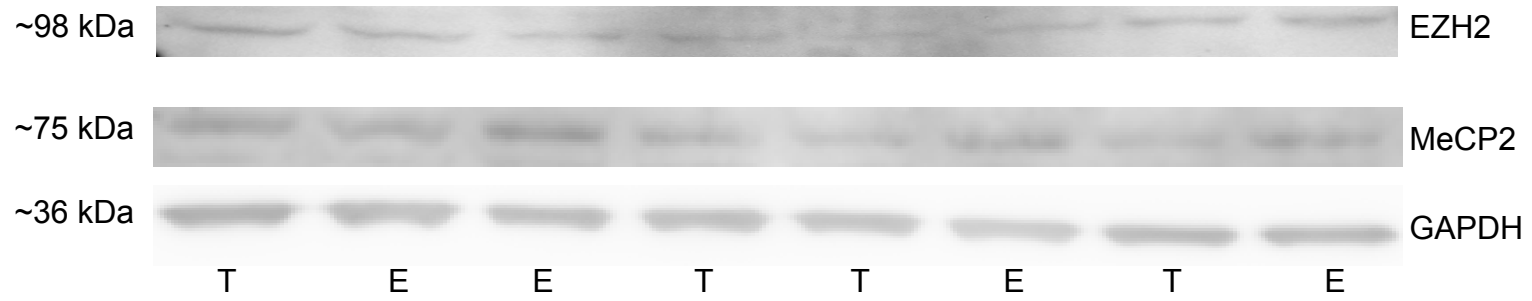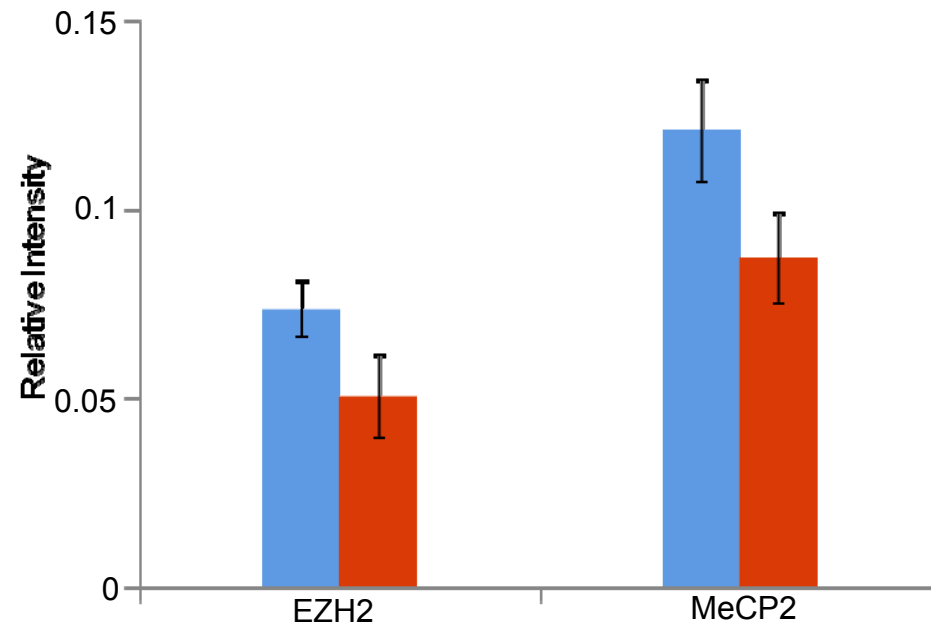

**Supplementary Figure S1**

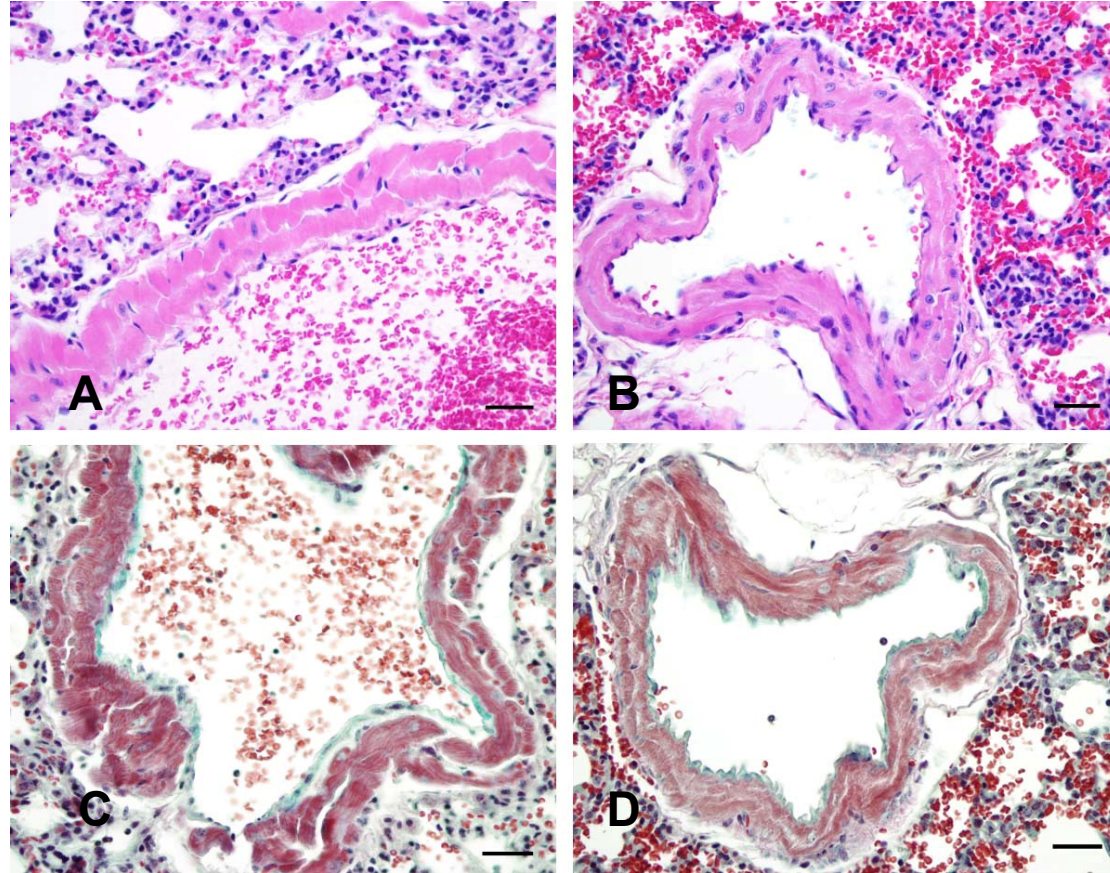

**Supplementary Figure S2**

**Supplementary Table 1:** List of miRNA genes with fold change and statistical significance of differential expression.

Not detectable in Euploid samples(NDBEu)

Not detectable in Ts65Dn samples(NDBTs)

| <b>Genes</b>                                              | <b>p-value</b> | <b>Fold Change</b> | <b>Direction</b> |
|-----------------------------------------------------------|----------------|--------------------|------------------|
| <b>(a) p &lt;= 0.05</b>                                   |                |                    |                  |
| mmu-miR-7b                                                | 0.002          | 1.68               | ↓                |
| mmu-miR-210                                               | 0.006          | 2.01               | ↑                |
| mmu-miR-181c                                              | 0.017          | 1.48               | ↓                |
| mmu-miR-155                                               | 0.022          | 2.21               | ↑                |
| mmu-miR-214                                               | 0.022          | 3.33               | ↑                |
| mmu-miR-138                                               | 0.023          | 1.54               | ↑                |
| mmu-miR-423-5p                                            | 0.024          | >>10 (NDBEu)       | ↑                |
| mmu-miR-369-5p                                            | 0.024          | 1.36               | ↓                |
| mmu-miR-361                                               | 0.025          | 1.31               | ↓                |
| mmu-miR-135b                                              | 0.041          | 1.70               | ↓                |
| mmu-miR-223                                               | 0.049          | 2.40               | ↑                |
| <b>(b) overexpressed in trisomy (Fold Change &gt;= 2)</b> |                |                    |                  |
| mmu-miR-423-5p                                            | 0.024          | >>10 (NDBEu)       | ↑                |
| mmu-miR-296-3p                                            | 0.056          | >>10 (NDBEu)       | ↑                |
| rno-miR-343                                               | 0.169          | 5.33               | ↑                |
| mmu-miR-743a                                              | 0.330          | 3.67               | ↑                |
| mmu-miR-680                                               | 0.355          | 3.48               | ↑                |
| mmu-miR-214                                               | 0.022          | 3.33               | ↑                |
| rno-miR-598-5p                                            | 0.213          | 3.10               | ↑                |
| mmu-miR-449b                                              | 0.385          | 3.07               | ↑                |
| rno-miR-409-5p                                            | 0.262          | 2.62               | ↑                |
| mmu-miR-504                                               | 0.301          | 2.43               | ↑                |
| mmu-miR-223                                               | 0.049          | 2.40               | ↑                |
| mmu-miR-490                                               | 0.479          | 2.39               | ↑                |
| mmu-miR-467d                                              | 0.424          | 2.23               | ↑                |
| mmu-miR-155                                               | 0.022          | 2.21               | ↑                |
| mmu-miR-325                                               | 0.440          | 2.21               | ↑                |
| mmu-miR-210                                               | 0.006          | 2.01               | ↑                |

**(c) overexpressed miRNAs in euploid mice (Fold Change  $\geq 2$ )**

|                 |       |              |   |
|-----------------|-------|--------------|---|
| mmu-miR-466h    | 0.191 | >>10 (NDBTs) | ↓ |
| rno-miR-466b    | 0.158 | >>10 (NDBTs) | ↓ |
| mmu-miR-450b-5p | 0.228 | >>10 (NDBTs) | ↓ |
| mmu-miR-590-5p  | 0.362 | >>10 (NDBTs) | ↓ |
| mmu-miR-540-5p  | 0.262 | 4.73         | ↓ |
| rno-miR-207     | 0.451 | 3.60         | ↓ |
| mmu-miR-200b    | 0.166 | 3.59         | ↓ |
| mmu-miR-582-3p  | 0.242 | 3.45         | ↓ |
| mmu-miR-542-5p  | 0.206 | 3.10         | ↓ |
| rno-miR-344-3p  | 0.538 | 3.03         | ↓ |
| mmu-miR-182     | 0.302 | 2.99         | ↓ |
| mmu-miR-200a    | 0.235 | 2.99         | ↓ |
| mmu-miR-211     | 0.367 | 2.73         | ↓ |
| mmu-miR-142-5p  | 0.095 | 2.35         | ↓ |
| mmu-miR-682     | 0.117 | 2.29         | ↓ |
| mmu-miR-380-3p  | 0.293 | 2.18         | ↓ |
| mmu-miR-503     | 0.435 | 2.11         | ↓ |
| mmu-miR-466h    | 0.191 | >>10 (NDBTs) | ↓ |

| Gene Symbol   | miRNA ID            | Gene Function                                                                                 |
|---------------|---------------------|-----------------------------------------------------------------------------------------------|
| 1700049G17Rik | mmu-miR-181c        | RIKEN cDNA 1700049G17 gene                                                                    |
| 2210418O10Rik | mmu-miR-181c        | RIKEN cDNA 2210418O10 gene                                                                    |
| 2310067B10Rik | mmu-miR-181c        | RIKEN cDNA 2310067B10 gene                                                                    |
| 2700078E11Rik | mmu-miR-155         | RIKEN cDNA 2700078E11 gene                                                                    |
| 2810046L04Rik | mmu-miR-181c        | RIKEN cDNA 2810046L04 gene                                                                    |
| 2810046L04Rik | mmu-miR-214         | RIKEN cDNA 2810046L04 gene                                                                    |
| 4921524J17Rik | mmu-miR-181c        | RIKEN cDNA 4921524J17 gene                                                                    |
| 4933426M11Rik | mmu-miR-214         | RIKEN cDNA 4933426M11 gene                                                                    |
| 4933433P14Rik | mmu-miR-181c        | RIKEN cDNA 4933433P14 gene                                                                    |
| A930001N09Rik | mmu-miR-181c        | RIKEN cDNA A930001N09 gene                                                                    |
| Aak1          | mmu-miR-361         | AP2 associated kinase 1                                                                       |
| Abl2          | mmu-miR-223         | v-abl Abelson murine leukemia viral oncogene homolog 2 (arg, Abelson-related gene)            |
| Adamts1       | mmu-miR-181c        | a disintegrin-like and metallopeptidase (reprolysin type) with thrombospondin type 1 motif, 1 |
| Adcy1         | mmu-miR-181c        | adenylate cyclase 1                                                                           |
| AF064781      | mmu-miR-181c        | zinc fingerprotein 619                                                                        |
| AI314180      | mmu-miR-135b        | expressed sequence AI314180                                                                   |
| <b>Akt3</b>   | <b>mmu-miR-181c</b> | <b>thymoma viral proto-oncogene 3</b>                                                         |
| Ank3          | mmu-miR-135b        | ankyrin 3, epithelial                                                                         |
| Ankrd12       | mmu-miR-7b          | ankyrin repeat domain 12                                                                      |
| Ankrd44       | mmu-miR-138         | ankyrin repeat domain 44                                                                      |
| Ankrd50       | mmu-miR-181c        | ankyrin repeat domain 50                                                                      |
| Antxr2        | mmu-miR-181c        | anthrax toxin receptor 2                                                                      |
| Api5          | mmu-miR-181c        | apoptosis inhibitor 5                                                                         |
| Arf6          | mmu-miR-181c        | ADP-ribosylation factor 6                                                                     |
| Arhgef7       | mmu-miR-181c        | Rho guanine nucleotide exchange factor (GEF7)                                                 |
| Arid4a        | mmu-miR-7b          | AT rich interactive domain 4A (RBP1-like)                                                     |
| Arl5a         | mmu-miR-181c        | ADP-ribosylation factor-like 5A                                                               |
| Asxl1         | mmu-miR-7b          | additional sex combs like 1 (Drosophila)                                                      |
| Atf2          | mmu-miR-181c        | activating transcription factor 2                                                             |
| Atg14         | mmu-miR-135b        | VATG14 autophagy related 14 homolog (S. cerevisiae)                                           |
| Atg5          | mmu-miR-181c        | autophagy-related 5 (yeast)                                                                   |
| Atp1b1        | mmu-miR-181c        | ATPase, Na <sup>+</sup> /K <sup>+</sup> transporting, beta 1 polypeptide                      |
| Atp8a1        | mmu-miR-135b        | ATPase, aminophospholipid transporter (APLT), class I, type 8A, member 1                      |
| Atxn1l        | mmu-miR-135b        | ataxin 1-like                                                                                 |
| Bach1         | mmu-miR-135b        | BTB and CNC homology 1                                                                        |
| Bach2         | mmu-miR-181c        | BTB and CNC homology 2                                                                        |
| Bai3          | mmu-miR-181c        | brain-specific angiogenesis inhibitor 3                                                       |

|         |              |                                                                                |
|---------|--------------|--------------------------------------------------------------------------------|
| Baz2b   | mmu-miR-181c | bromodomain adjacent to zinc finger domain, 2B                                 |
| Bcl6b   | mmu-miR-181c | B-cell CLL/lymphoma 6, member B                                                |
| Bcor1   | mmu-miR-361  | BCL6 co-repressor-like 1                                                       |
| Birc6   | mmu-miR-181c | baculoviral IAP repeat-containing 6                                            |
| Brdt    | mmu-miR-214  | bromodomain, testis-specific                                                   |
| Brpf3   | mmu-miR-223  | bromodomain and PHD finger containing, 3                                       |
| Brwd1   | mmu-miR-181c | bromodomain and WD repeat domain containing 1                                  |
| Bsn     | mmu-miR-135b | bassoon                                                                        |
| Btbd3   | mmu-miR-181c | BTB (POZ) domain containing 3                                                  |
| C77370  | mmu-miR-181c | expressed sequence C77370                                                      |
| Cacna1e | mmu-miR-135b | calcium channel, voltage-dependent, R type, alpha 1E subunit                   |
| Cacnb4  | mmu-miR-155  | calcium channel, voltage-dependent, beta 4 subunit                             |
| Calb1   | mmu-miR-181c | calbindin 1                                                                    |
| Camk1g  | mmu-miR-135b | calcium/calmodulin-dependent protein kinase I gamma                            |
| Camk2d  | mmu-miR-361  | calcium/calmodulin-dependent protein kinase II, delta                          |
| Cblb    | mmu-miR-181c | Casitas B-lineage lymphoma b                                                   |
| Cds2    | mmu-miR-181c | CDP-diacylglycerol synthase (phosphatidate cytidyltransferase) 2               |
| Cecr2   | mmu-miR-181c | cat eye syndrome chromosome region, candidate 2 homolog (human)                |
| Cenpb   | mmu-miR-135b | centromere protein B                                                           |
| Cggbp1  | mmu-miR-181c | CGG triplet repeat binding protein 1                                           |
| Chd3    | mmu-miR-181c | B-cell CLL/lymphoma 6, member B                                                |
| Chd7    | mmu-miR-181c | chromodomain helicase DNA binding protein 7                                    |
| Chrn2   | mmu-miR-138  | cholinergic receptor, nicotinic, beta polypeptide 2 (neuronal)                 |
| Clasp1  | mmu-miR-181c | CLIP associating protein 1                                                     |
| Clock   | mmu-miR-181c | circadian locomotor output cycles kaput                                        |
| Cntnap1 | mmu-miR-135b | contactin associated protein-like 1                                            |
| Cops2   | mmu-miR-181c | COP9 (constitutive photomorphogenic) homolog, subunit 2 (Arabidopsis thaliana) |
| Cpeb4   | mmu-miR-181c | cytoplasmic polyadenylation element binding protein 4                          |
| Cplx1   | mmu-miR-135b | complexin 1                                                                    |
| Cplx2   | mmu-miR-135b | complexin 2                                                                    |
| Cramp1l | mmu-miR-135b | Crm, cramped-like (Drosophila)                                                 |
| Cttnbp2 | mmu-miR-135b | cortactin binding protein 2                                                    |
| Cxcl12  | mmu-miR-214  | chemokine (C-X-C motif) ligand 12                                              |
| Cyp1b1  | mmu-miR-181c | cytochrome P450, family 1, subfamily b, polypeptide 1                          |



|               |              |                                                                            |
|---------------|--------------|----------------------------------------------------------------------------|
| D430041D05Rik | mmu-miR-181c | RIKEN cDNA D430041D05 gene                                                 |
| Ddx19b        | mmu-miR-214  | DEAD (Asp-Glu-Ala-Asp) box polypeptide 19b                                 |
| Ddx3x         | mmu-miR-181c | expressed sequence C77371                                                  |
| Dio2          | mmu-miR-181c | deiodinase, iodothyronine, type II                                         |
| Dip2c         | mmu-miR-181c | DIP2 disco-interacting protein 2 homolog C (Drosophila)                    |
| Dirc2         | mmu-miR-135b | disrupted in renal carcinoma 2 (human)                                     |
| Dmxl2         | mmu-miR-181c | Dmx-like 2                                                                 |
| Dnajc13       | mmu-miR-181c | DnaJ (Hsp40) homolog, subfamily C, member 13                               |
| Dock4         | mmu-miR-181c | dedicator of cytokinesis 4                                                 |
| Dpp10         | mmu-miR-361  | dipeptidylpeptidase 10                                                     |
| Dtna          | mmu-miR-135b | dystrobrevin alpha                                                         |
| E2f7          | mmu-miR-181c | E2F transcription factor 7                                                 |
| Eif4a2        | mmu-miR-181c | eukaryotic translation initiation factor 4A2                               |
| Elavl2        | mmu-miR-181c | ELAV (embryonic lethal, abnormal vision, Drosophila)-like 2 (Hu antigen B) |
| Elavl4        | mmu-miR-181c | ELAV (embryonic lethal, abnormal vision, Drosophila)-like 4 (Hu antigen D) |
| En2           | mmu-miR-181c | engrailed 2                                                                |
| Entpd7        | mmu-miR-135b | ectonucleoside triphosphate diphosphohydrolase 7                           |
| Epha4         | mmu-miR-181c | Eph receptor A4                                                            |
| Esrra         | mmu-miR-135b | estrogen related receptor, alpha                                           |
| Evi5          | mmu-miR-135b | ecotropic viral integration site 5                                         |
| F730047E07Rik | mmu-miR-361  | RIKEN cDNA F730047E07 gene                                                 |
| Fastkd2       | mmu-miR-181c | FAST kinase domains 2                                                      |
| Fbn2          | mmu-miR-181c | fibrillin 2                                                                |
| Fbxl3         | mmu-miR-181c | F-box and leucine-rich repeat protein 3                                    |
| Fbxo11        | mmu-miR-181c | F-box protein 11                                                           |
| Fgf11         | mmu-miR-135b | fibroblast growth factor 11                                                |
| Fign          | mmu-miR-181c | fidgetin                                                                   |
| Fndc3a        | mmu-miR-181c | fibronectin type III domain containing 3A                                  |
| Fndc3b        | mmu-miR-181c | fibronectin type III domain containing 3B                                  |
| Fos           | mmu-miR-181c | FBJ osteosarcoma oncogene                                                  |
| Foxn3         | mmu-miR-135b | forkhead box N3                                                            |
| Foxp1         | mmu-miR-181c | forkhead box P1                                                            |
| Frmpd4        | mmu-miR-135b | FERM and PDZ domain containing 4                                           |
| Gabrb2        | mmu-miR-135b | gamma-aminobutyric acid (GABA) A receptor, subunit beta 2                  |
| Glrb          | mmu-miR-135b | glycine receptor, beta subunit                                             |
| Golga4        | mmu-miR-361  | golgi autoantigen, golgin subfamily a, 4                                   |
| Gpr17         | mmu-miR-138  | G protein-coupled receptor 17                                              |
| Gpr21         | mmu-miR-135b | G protein-coupled receptor 21                                              |
| Gpr22         | mmu-miR-181c | G protein-coupled receptor 22                                              |
| Grik2         | mmu-miR-181c | glutamate receptor, ionotropic, kainate 2 (beta 2)                         |

|        |              |                                                                                    |
|--------|--------------|------------------------------------------------------------------------------------|
| Gse1   | mmu-miR-181c | genetic suppressor element 1                                                       |
| Gsk3b  | mmu-miR-135b | glycogen synthase kinase 3 beta                                                    |
| Hcn2   | mmu-miR-135b | hyperpolarization-activated, cyclic nucleotide-gated K+ 2                          |
| Hic2   | mmu-miR-181c | hypermethylated in cancer 2                                                        |
| Hif1an | mmu-miR-135b | hypoxia-inducible factor 1, alpha subunit inhibitor                                |
| Hnf4a  | mmu-miR-135b | hepatic nuclear factor 4, alpha                                                    |
| Hoxa11 | mmu-miR-181c | homeobox A11                                                                       |
| Il1a   | mmu-miR-181c | interleukin 1 alpha                                                                |
| Insl3  | mmu-miR-181c | genetic suppressor element 2                                                       |
| Ippk   | mmu-miR-181c | inositol 1,3,4,5,6-pentakisphosphate 2-kinase                                      |
| Kcna4  | mmu-miR-181c | potassium voltage-gated channel, shaker-related subfamily, member 4                |
| Kcnab3 | mmu-miR-135b | potassium voltage-gated channel, shaker-related subfamily, beta member 3           |
| Kcnc1  | mmu-miR-214  | potassium voltage gated channel, Shaw-related subfamily, member 1                  |
| Kcnd1  | mmu-miR-135b | potassium voltage-gated channel, Shal-related family, member 1                     |
| Kcnh7  | mmu-miR-181c | potassium voltage-gated channel, subfamily H (eag-related), member 7               |
| Kcnma1 | mmu-miR-181c | potassium large conductance calcium-activated channel, subfamily M, alpha member 1 |
| Kif16b | mmu-miR-7b   | kinesin family member 16B                                                          |
| Kif3b  | mmu-miR-135b | kinesin family member 3B                                                           |
| Klf6   | mmu-miR-181c | Kruppel-like factor 6                                                              |
| Klhl1  | mmu-miR-181c | kelch-like 1 (Drosophila)                                                          |
| Kpna1  | mmu-miR-181c | karyopherin (importin) alpha 1                                                     |
| Lats2  | mmu-miR-135b | large tumor suppressor 2                                                           |
| Lin28b | mmu-miR-181c | lin-28 homolog B (C. elegans)                                                      |
| Lmtk2  | mmu-miR-214  | lemur tyrosine kinase 2                                                            |
| Lnp    | mmu-miR-214  | limb and neural patterns                                                           |
| Lonrf1 | mmu-miR-135b | LON peptidase N-terminal domain and ring finger 1                                  |
| Lrrn1  | mmu-miR-181c | leucine rich repeat protein 1, neuronal                                            |
| Macf1  | mmu-miR-138  | microtubule-actin crosslinking factor 1                                            |
| Macf1  | mmu-miR-214  | microtubule-actin crosslinking factor 1                                            |
| Macf1  | mmu-miR-223  | microtubule-actin crosslinking factor 1                                            |
| Man1a  | mmu-miR-135b | mannosidase 1, alpha                                                               |
| Mapk1  | mmu-miR-181c | mitogen-activated protein kinase 1                                                 |
| Mapre1 | mmu-miR-214  | microtubule-associated protein, RP/EB family, member 1                             |
| Mapre2 | mmu-miR-135b | microtubule-associated protein, RP/EB family, member 2                             |

|        |              |                                                                   |
|--------|--------------|-------------------------------------------------------------------|
| Mast2  | mmu-miR-138  | microtubule associated serine/threonine kinase 2                  |
| Mbnl2  | mmu-miR-181c | muscleblind-like 2                                                |
| Mecp2  | mmu-miR-138  | methyl CpG binding protein 2                                      |
| Mecp2  | mmu-miR-155  | methyl CpG binding protein 2                                      |
| Mecp2  | mmu-miR-361  | methyl CpG binding protein 2                                      |
| Med13  | mmu-miR-135b | mediator complex subunit 13                                       |
| Mesdc2 | mmu-miR-214  | mesoderm development candidate 2                                  |
| Mier3  | mmu-miR-181c | mesoderm induction early response 1, family member 3              |
| Mll1   | mmu-miR-181c | myeloid/lymphoid or mixed-lineage leukemia 1                      |
| MLxip  | mmu-miR-138  | MLX interacting protein                                           |
| MLxip  | mmu-miR-214  | MLX interacting protein                                           |
| Mmp16  | mmu-miR-135b | matrix metalloproteinase 16                                       |
| Msi2   | mmu-miR-181c | Musashi homolog 2 (Drosophila)                                    |
| Mtap2  | mmu-miR-361  | microtubule-associated protein 2                                  |
| Mtf2   | mmu-miR-181c | metal response element binding transcription factor 2             |
| Mtif3  | mmu-miR-138  | mitochondrial translational initiation factor 3                   |
| Mtrr   | mmu-miR-361  | 5-methyltetrahydrofolate-homocysteine methyltransferase reductase |
| Mtus1  | mmu-miR-135b | mitochondrial tumor suppressor 1                                  |
| Mybl1  | mmu-miR-181c | myeloblastosis oncogene-like 1                                    |
| Myh10  | mmu-miR-181c | myosin, heavy polypeptide 10, non-muscle                          |
| Myh10  | mmu-miR-223  | myosin, heavy polypeptide 10, non-muscle                          |
| Myo18a | mmu-miR-214  | myosin XVIIIa                                                     |
| Ncoa2  | mmu-miR-181c | nuclear receptor coactivator 2                                    |
| Neto2  | mmu-miR-135b | neuropilin (NRP) and tolloid (TLL)-like 2                         |
| Nf1    | mmu-miR-135b | neurofibromatosis 1                                               |
| Nf1    | mmu-miR-214  | neurofibromatosis 1                                               |
| Nfic   | mmu-miR-135b | mannosidase 1, alpha                                              |
| Nova1  | mmu-miR-181c | neuro-oncological ventral antigen 1                               |
| Nptn   | mmu-miR-181c | neuroplastin                                                      |
| Nr1d2  | mmu-miR-181c | nuclear receptor subfamily 1, group D, member 2                   |
| Nr3c1  | mmu-miR-181c | nuclear receptor subfamily 3, group C, member 1                   |
| Nr3c2  | mmu-miR-135b | nuclear receptor subfamily 3, group C, member 2                   |
| Nr4a3  | mmu-miR-181c | nuclear receptor subfamily 4, group A, member 3                   |
| Ntrk2  | mmu-miR-135b | neurotrophic tyrosine kinase, receptor, type 2                    |
| Nup153 | mmu-miR-135b | nucleoporin 153                                                   |
| Oxtr   | mmu-miR-138  | oxytocin receptor                                                 |
| Pak7   | mmu-miR-215  | microtubule-associated protein, RP/EB family, member 2            |

|          |              |                                                                             |
|----------|--------------|-----------------------------------------------------------------------------|
| Palm2    | mmu-miR-181c | nuclear receptor subfamily 4, group A, member 4                             |
| Pank3    | mmu-miR-361  | pantothenate kinase 3                                                       |
| Papd5    | mmu-miR-181c | PAP associated domain containing 5                                          |
| Pcdh15   | mmu-miR-138  | protocadherin 15                                                            |
| Pcdha11  | mmu-miR-181c | protocadherin alpha 11                                                      |
| Pcnp     | mmu-miR-181c | PEST proteolytic signal containing nuclear protein                          |
| Pcyt1b   | mmu-miR-135b | phosphate cytidyltransferase 1, choline, beta isoform                       |
| Pdcl     | mmu-miR-135b | phosducin-like                                                              |
| Pde4b    | mmu-miR-361  | phosphodiesterase 4B, cAMP specific                                         |
| Pdgfra   | mmu-miR-181c | platelet derived growth factor receptor, alpha polypeptide                  |
| Pdpk1    | mmu-miR-214  | 3-phosphoinositide dependent protein kinase 1                               |
| Pds5b    | mmu-miR-223  | PDS5, regulator of cohesion maintenance, homolog B ( <i>S. cerevisiae</i> ) |
| Peli2    | mmu-miR-135b | pellino 2                                                                   |
| Phactr1  | mmu-miR-181c | phosphatase and actin regulator 1                                           |
| Phf15    | mmu-miR-181c | PHD finger protein 15                                                       |
| Phf15    | mmu-miR-214  | PHD finger protein 15                                                       |
| Phox2b   | mmu-miR-181c | paired-like homeobox 2b                                                     |
| Pik3cd   | mmu-miR-7b   | phosphatidylinositol 3-kinase catalytic delta polypeptide                   |
| Plch2    | mmu-miR-138  | phospholipase C, eta 2                                                      |
| Plxna2   | mmu-miR-361  | plexin A2                                                                   |
| Ppp2r5c  | mmu-miR-135b | protein phosphatase 2, regulatory subunit B (B56), gamma isoform            |
| Prkcd    | mmu-miR-181c | protein kinase C, delta                                                     |
| Psme4    | mmu-miR-135b | proteasome (prosome, macropain) activator subunit 4                         |
| Pten     | mmu-miR-181c | phosphatase and tensin homolog                                              |
| Rab14    | mmu-miR-214  | RAB14, member RAS oncogene family                                           |
| Rab3gap1 | mmu-miR-361  | RAB3 GTPase activating protein subunit 1                                    |
| Rab8b    | mmu-miR-223  | RAB8B, member RAS oncogene family                                           |
| Rac1     | mmu-miR-361  | RAS-related C3 botulinum substrate 1                                        |
| Rad23b   | mmu-miR-181c | RAD23b homolog ( <i>S. cerevisiae</i> )                                     |
| Rad51l3  | mmu-miR-181c | RAD51-like 3 ( <i>S. cerevisiae</i> )                                       |
| Rap1gds1 | mmu-miR-135b | RAP1, GTP-GDP dissociation stimulator 1                                     |
| Rapgef6  | mmu-miR-135b | Rap guanine nucleotide exchange factor (GEF) 6                              |
| Rassf8   | mmu-miR-139  | oxytocin receptor                                                           |
| Rbak     | mmu-miR-135b | RB-associated KRAB repressor                                                |
| Rbbp7    | mmu-miR-181c | retinoblastoma binding protein 7                                            |
| Rbfox2   | mmu-miR-135b | RNA binding protein, fox-1 homolog ( <i>C. elegans</i> ) 2                  |

|         |              |                                                                                    |
|---------|--------------|------------------------------------------------------------------------------------|
| Rbm16   | mmu-miR-361  | RNA binding motif protein 16                                                       |
| Rbm26   | mmu-miR-181c | RNA binding motif protein 26                                                       |
| Rex2    | mmu-miR-181c | reduced expression 2                                                               |
| Rgl1    | mmu-miR-135b | ral guanine nucleotide dissociation stimulator,-like 1                             |
| Rgl2    | mmu-miR-362  | RNA binding motif protein 17                                                       |
| Rlf     | mmu-miR-181c | rearranged L-myc fusion sequence                                                   |
| Rnf157  | mmu-miR-135b | ring finger protein 157                                                            |
| Rnf34   | mmu-miR-181c | ring finger protein 34                                                             |
| Rock2   | mmu-miR-135b | Rho-associated coiled-coil containing protein kinase 2                             |
| Rragb   | mmu-miR-361  | Ras-related GTP binding B                                                          |
| Rsad1   | mmu-miR-181c | radical S-adenosyl methionine domain containing 1                                  |
| Rsb1    | mmu-miR-7b   | rosbin, round spermatid basic protein 1                                            |
| Rufy2   | mmu-miR-135b | RUN and FYVE domain-containing 2                                                   |
| Rufy2   | mmu-miR-155  | RUN and FYVE domain-containing 2                                                   |
| Sbno1   | mmu-miR-181c | sno, strawberry notch homolog 1 (Drosophila)                                       |
| Schip1  | mmu-miR-181c | schwannomin interacting protein 1                                                  |
| Scn2b   | mmu-miR-135b | sodium channel, voltage-gated, type II, beta                                       |
| Sdk1    | mmu-miR-361  | sidekick homolog 1 (chicken)                                                       |
| Sel1l   | mmu-miR-181c | sel-1 suppressor of lin-12-like (C. elegans)                                       |
| Sema6d  | mmu-miR-181c | sema domain, transmembrane domain (TM), and cytoplasmic domain, (semaphorin) 6D    |
| Setd7   | mmu-miR-135b | SET domain containing (lysine methyltransferase) 7                                 |
| Sfrs18  | mmu-miR-181c | serine/arginine-rich splicing factor 18                                            |
| Sgpp1   | mmu-miR-181c | sphingosine-1-phosphate phosphatase 1                                              |
| Sirt1   | mmu-miR-181c | sirtuin 1 (silent mating type information regulation 2, homolog) 1 (S. cerevisiae) |
| Slc24a2 | mmu-miR-135b | solute carrier family 24 (sodium/potassium/calcium exchanger), member 2            |
| Slc35a5 | mmu-miR-361  | solute carrier family 35, member A5                                                |
| Slc6a2  | mmu-miR-181c | PAP associated domain containing 6                                                 |
| Slc6a5  | mmu-miR-135b | solute carrier family 6 (neurotransmitter transporter, glycine), member 5          |
| Slc6a5  | mmu-miR-361  | solute carrier family 6 (neurotransmitter transporter, glycine), member 5          |
| Slc8a1  | mmu-miR-135b | solute carrier family 8 (sodium/calcium exchanger), member 1                       |
| Slc8a1  | mmu-miR-181c | solute carrier family 8 (sodium/calcium exchanger), member 1                       |
| Slc8a1  | mmu-miR-214  | solute carrier family 8 (sodium/calcium exchanger), member 1                       |
| Slc8a1  | mmu-miR-223  | solute carrier family 8 (sodium/calcium exchanger), member 1                       |

|           |              |                                                                                            |
|-----------|--------------|--------------------------------------------------------------------------------------------|
| Smad5     | mmu-miR-135b | MAD homolog 5 (Drosophila)                                                                 |
| Smad7     | mmu-miR-181c | MAD homolog 7 (Drosophila)                                                                 |
| Sos1      | mmu-miR-181c | son of sevenless homolog 1 (Drosophila)                                                    |
| Sox6      | mmu-miR-181c | SRY-box containing gene 6                                                                  |
| Sp3       | mmu-miR-135b | trans-acting transcription factor 3                                                        |
| Spin1     | mmu-miR-181c | spindlin 1                                                                                 |
| Spire1    | mmu-miR-181c | spire homolog 1 (Drosophila)                                                               |
| Srrm2     | mmu-miR-138  | serine/arginine repetitive matrix 2                                                        |
| Ss18l1    | mmu-miR-181c | synovial sarcoma translocation gene on chromosome 18-like 1                                |
| Ssx2ip    | mmu-miR-181c | synovial sarcoma, X breakpoint 2 interacting protein                                       |
| St8sia3   | mmu-miR-181c | ST8 alpha-N-acetyl-neuraminide alpha-2,8-sialyltransferase 3                               |
| Stk32a    | mmu-miR-210  | serine/threonine kinase 32A                                                                |
| Stt3b     | mmu-miR-181c | STT3, subunit of the oligosaccharyltransferase complex, homolog B ( <i>S. cerevisiae</i> ) |
| Stx8      | mmu-miR-214  | syntaxin 8                                                                                 |
| Stxbp6    | mmu-miR-7b   | syntaxin binding protein 6 (amisyn)                                                        |
| Suv420h2  | mmu-miR-135b | suppressor of variegation 4-20 homolog 2 (Drosophila)                                      |
| Syncrip   | mmu-miR-181c | synaptotagmin binding, cytoplasmic RNA interacting protein                                 |
| Syncrip   | mmu-miR-223  | synaptotagmin binding, cytoplasmic RNA interacting protein                                 |
| Syncrip   | mmu-miR-361  | synaptotagmin binding, cytoplasmic RNA interacting protein                                 |
| Tacc1     | mmu-miR-214  | transforming, acidic coiled-coil containing protein 1                                      |
| Tardbp    | mmu-miR-181c | TAR DNA binding protein                                                                    |
| Tcerg1    | mmu-miR-181c | transcription elongation regulator 1 (CA150)                                               |
| Tcf7l2    | mmu-miR-135b | transcription factor 7-like 2, T-cell specific, HMG-box                                    |
| Tcf7l2    | mmu-miR-181c | transcription factor 7-like 2, T-cell specific, HMG-box                                    |
| Tgfbr1    | mmu-miR-181c | transforming growth factor, beta receptor I                                                |
| Tgm2      | mmu-miR-138  | transglutaminase 2, C polypeptide                                                          |
| Tmem87b   | mmu-miR-181c | transmembrane protein 87B                                                                  |
| Tmod2     | mmu-miR-138  | tropomodulin 2                                                                             |
| Tnfrsf11b | mmu-miR-181c | tumor necrosis factor receptor superfamily, member 11b (osteoprotegerin)                   |
| Tnpo1     | mmu-miR-135b | transportin 1                                                                              |
| Tnpo1     | mmu-miR-181c | transportin 1                                                                              |
| Tnrc6b    | mmu-miR-181c | trinucleotide repeat containing 6b                                                         |
| Tomm70a   | mmu-miR-135b | translocase of outer mitochondrial membrane 70 homolog A (yeast)                           |
| Topors    | mmu-miR-135b | topoisomerase I binding, arginine/serine-rich                                              |

|         |              |                                                                                           |
|---------|--------------|-------------------------------------------------------------------------------------------|
| Trim66  | mmu-miR-214  | tripartite motif-containing 66                                                            |
| Trim71  | mmu-miR-181c | tripartite motif-containing 71                                                            |
| Trpc2   | mmu-miR-214  | transient receptor potential cation channel, subfamily C, member 2                        |
| Tsc22d2 | mmu-miR-181c | TSC22 domain family, member 2                                                             |
| Tshz3   | mmu-miR-155  | teashirt zinc finger family member 3                                                      |
| Ttc14   | mmu-miR-135b | tetratricopeptide repeat domain 14                                                        |
| Ttn     | mmu-miR-138  | titin                                                                                     |
| Ttpa    | mmu-miR-181c | tocopherol (alpha) transfer protein                                                       |
| Ubox5   | mmu-miR-135b | U box domain containing 5                                                                 |
| Ubr5    | mmu-miR-361  | ubiquitin protein ligase E3 component n-recognin 5                                        |
| Ulk2    | mmu-miR-223  | Unc-51 like kinase 2 (C. elegans)                                                         |
| Usp14   | mmu-miR-181c | ubiquitin specific peptidase 14                                                           |
| Usp20   | mmu-miR-214  | ubiquitin specific peptidase 20                                                           |
| Usp49   | mmu-miR-139  | serine/arginine repetitive matrix 3                                                       |
| Vapb    | mmu-miR-215  | ubiquitin specific peptidase 21                                                           |
| Vcan    | mmu-miR-135b | versican                                                                                  |
| Vcan    | mmu-miR-181c | versican                                                                                  |
| Vegfa   | mmu-miR-361  | vascular endothelial growth factor A                                                      |
| Vps37c  | mmu-miR-135b | vacuolar protein sorting 37C (yeast)                                                      |
| Wasl    | mmu-miR-181c | Wiskott-Aldrich syndrome-like (human)                                                     |
| Wdr37   | mmu-miR-181c | WD repeat domain 37                                                                       |
| Wdr47   | mmu-miR-7b   | WD repeat domain 47                                                                       |
| Wipf2   | mmu-miR-7b   | WAS/WASL interacting protein family, member 2                                             |
| Wnk1    | mmu-miR-181c | Wiskott-Aldrich syndrome-like (human)                                                     |
| Yipf6   | mmu-miR-181c | Yip1 domain family, member 6                                                              |
| Ythdc2  | mmu-miR-181c | YTH domain containing 2                                                                   |
| Ythdf2  | mmu-miR-181c | YTH domain family 2                                                                       |
| Ythdf3  | mmu-miR-181c | YTH domain family 3                                                                       |
| Ywhag   | mmu-miR-181c | tyrosine 3-monooxygenase/tryptophan 5-monooxygenase activation protein, gamma polypeptide |
| Zfp120  | mmu-miR-181c | zinc finger protein 120                                                                   |
| Zfp14   | mmu-miR-181c | zinc finger protein 14                                                                    |
| Zfp235  | mmu-miR-135b | zinc finger protein 235                                                                   |
| Zfp238  | mmu-miR-361  | zinc finger protein 238                                                                   |
| Zfp286  | mmu-miR-181c | zinc finger protein 286                                                                   |
| Zfp335  | mmu-miR-214  | zinc finger protein 335                                                                   |
| Zfp36l2 | mmu-miR-181c | zinc finger protein 36, C3H type-like 2                                                   |
| Zfp518a | mmu-miR-135b | zinc finger protein 518A                                                                  |
| Zfp618  | mmu-miR-181c | zinc fingerprotein 618                                                                    |
| Zfp820  | mmu-miR-181c | zinc finger protein 820                                                                   |
| Zfp945  | mmu-miR-181c | zinc finger protein 945                                                                   |
| Zfp97   | mmu-miR-181c | zinc finger protein 97                                                                    |
| Zhx3    | mmu-miR-214  | zinc fingers and homeoboxes 3                                                             |

|       |              |                                     |
|-------|--------------|-------------------------------------|
| Zmat3 | mmu-miR-361  | zinc finger matrin type 3           |
| Zxdb  | mmu-miR-181c | zinc finger, X-linked, duplicated B |



**Supplementary Table 3:** miRNAs expression in Ts65Dn Lung. Relative expression levels in 5 trisomy samples  $\pm$  SEM is shown with respect to 5 euploid controls. No expression was observed for miR-802 in Lung tissue of either trisomy or control mice.

| <b>miRNA</b> | <b>Relative expression<br/>in lung tissue<br/>Ts65Dn/Euploid (N=5)</b> |
|--------------|------------------------------------------------------------------------|
| miR-802      | no detectable expression                                               |
| miR-155      | 1.84 $\pm$ 0.28 (p=0.2)                                                |
| miR-223      | 1.66 $\pm$ 0.16 (p=0.2)                                                |
| miR-204      | 1.42 $\pm$ 0.14 (p=0.1)                                                |
| miR-214      | 1.19 $\pm$ 0.06 (p=0.2)                                                |

**Supplementary Table 4**

| <b>Name of miRNA/mRNA</b> | <b>Sequence</b>                                                                                                                  |
|---------------------------|----------------------------------------------------------------------------------------------------------------------------------|
| miR-802                   | UCAGUAACAAAGAUUCAUCCUU (assay ID: 002029)                                                                                        |
| miR-155                   | UUAAUGCUAAUUGUGAUAGGGGU (assay ID:002571)                                                                                        |
| miR-223                   | UGUCAGUUUGUCAAAUACCCCA (assay ID: 002295)                                                                                        |
| miR-214                   | ACAGCAGGCACAGACAGGCAGU (assay ID: 002306)                                                                                        |
| miR-204                   | UUCCCUUUGUCAUCCUAUGCCU (assay ID: 000508)                                                                                        |
| U6                        | GTGCTCGCTTCGGCAGCACATATACTAAAATTGGAACGATACAGAGAAGATTAGCATGGCCCCT<br>GCGCAAGGATGACACGCAAATTCGTGAAGCGTTCATATTTT (assay ID: 001973) |
| Ship1 Forward             | CGGTTTCATCTTCCACAGCCAAC[FAM]G (Cat.#:10336022 161262 A02)                                                                        |
| Ship1 Reverse             | GCTTCCACCTTTCCAGATCC (Cat.#: 10336022 161229 D02)                                                                                |
| Mecp2 Forward             | CGCTTAGGAGGCTCACTGGAAAG[FC]G (Cat.#: 20439213 159899 A07)                                                                        |
| Mecp2 Reverse             | GGCGACCATAGGCTGAGTCTT (Cat.#: 20439213 159691 B02)                                                                               |
| Ezh2 Forward              | CGCTGTAAACCAAGAGTGAAGCAG[FC]G (Cat.#: 20454511 159848 A12)                                                                       |
| Ezh2 Reverse              | ACTCCCTAGTCCC GCGCAAT (Cat.#: 20454511 824E06)                                                                                   |
| Creb1 Forward             | CAATCTTCAAGCCCAGCCACAGA[FT]TG (Cat.#: 20439213 159899 A08)                                                                       |
| Creb1 Reverse             | GGAGCAGATGATGTTGCATGAG (Cat.#: 20439213 159691 B03)                                                                              |
